# Supplementary material for: High-Fidelity Modelling Methodology of Light-Limited Photosynthetic Production in Microalgae
Source: PLoS One. 2016 Apr 7;11(4):e0152387. doi: 10.1371/journal.pone.0152387 (PMC4824504; doi:10.1371/journal.pone.0152387)
Supplement: S1 Dataset — Excel file containing all the experimental data used in the paper. (XLSX) [file pone.0152387.s001.xlsx]

## Sheet: data set description
sheet name	experiments
Exp1	PAM experiment Exp1
Exp2	PAM experiment Exp2
Exp3	PAM experiment Exp3
Val1	PAM experiment Val1
Val2	PAM experiment Val2
Val3	PAM experiment Val3
PI experiment	PI measurements of sample 1, 2 and 3
ASII exp	ASII experiment and fluorescence induction curve

## Sheet: Exp1 
Actinic light profile					Fluorescence fluxes					standard deviations
interval duration [s]	start time [s]	end time [s]	light intensity [uE/m2s]		time [s]	F'0 [V]	F'm [V]	F' [V]		F'0	F'm	F'
60	0	60	14		0	0.078	0.223	0.077		0.00228	0.00373	0.00227
60	60	120	21		60	0.078	0.224	0.083		0.00228	0.00374	0.00233
60	120	180	45		120	0.078	0.227	0.082		0.00228	0.00377	0.00232
60	180	240	78		180	0.078	0.226	0.083		0.00228	0.00376	0.00233
60	240	300	134		240	0.078	0.222	0.084		0.00228	0.00372	0.00234
60	300	360	174		300	0.077	0.214	0.087		0.00227	0.00364	0.00237
60	360	420	224		360	0.076	0.209	0.088		0.00226	0.00359	0.00238
60	420	480	281		420	0.075	0.198	0.088		0.00225	0.00348	0.00238
60	480	540	347		480	0.072	0.18	0.087		0.00222	0.0033	0.00237
60	540	600	438		540	0.069	0.16	0.083		0.00219	0.0031	0.00233
60	600	660	539		600	0.064	0.137	0.079		0.00214	0.00287	0.00229
60	660	720	668		660	0.059	0.116	0.073		0.00209	0.00266	0.00223
60	720	780	833		720	0.054	0.098	0.067		0.00204	0.00248	0.00217
60	780	840	1036		780	0.049	0.082	0.061		0.00199	0.00232	0.00211
60	840	900	1295		840	0.044	0.07	0.057		0.00194	0.0022	0.00207
60	900	960	1602		900	0.041	0.061	0.053		0.00191	0.00211	0.00203
60	960	1020	1960		960	0.038	0.055	0.05		0.00188	0.00205	0.002
60	1020	1080	14		1020	0.036	0.051	0.047		0.00186	0.00201	0.00197
60	1080	1140	14		1080	0.066	0.146	0.07		0.00216	0.00296	0.0022
60	1140	1200	14		1140	0.067	0.154	0.07		0.00217	0.00304	0.0022
					1200	0.069	0.156	0.071		0.00219	0.00306	0.00221

## Sheet: Exp2
Actinic light profile					Fluorescence fluxes					standard deviations
interval duration [s]	start time [s]	end time [s]	light intensity [uE/m2s]		time [s]	F'0 [V]	F'm [V]	F' [V]		F'0	F'm	F'
14.3	0	14.3	1e-06		14.3	0.101	0.26	0.101		0.00251	0.0041	0.00251
624.5	14.3	638.8	1960		158.6	0.052	0.075	0.073		0.00202	0.00225	0.00223
3620.2	638.8	4259	1e-06		178.6	0.051	0.074	0.071		0.00201	0.00224	0.00221
					198.7	0.051	0.073	0.069		0.00201	0.00223	0.00219
					218.7	0.05	0.073	0.069		0.002	0.00223	0.00219
					238.8	0.05	0.072	0.069		0.002	0.00222	0.00219
					258.8	0.049	0.07	0.066		0.00199	0.0022	0.00216
					278.8	0.048	0.068	0.064		0.00198	0.00218	0.00214
					298.8	0.048	0.067	0.064		0.00198	0.00217	0.00214
					318.7	0.047	0.065	0.062		0.00197	0.00215	0.00212
					338.7	0.046	0.064	0.06		0.00196	0.00214	0.0021
					358.7	0.045	0.062	0.058		0.00195	0.00212	0.00208
					378.7	0.044	0.06	0.056		0.00194	0.0021	0.00206
					398.7	0.043	0.058	0.055		0.00193	0.00208	0.00205
					418.7	0.042	0.057	0.054		0.00192	0.00207	0.00204
					438.7	0.042	0.056	0.053		0.00192	0.00206	0.00203
					458.7	0.041	0.054	0.051		0.00191	0.00204	0.00201
					478.8	0.04	0.053	0.051		0.0019	0.00203	0.00201
					498.8	0.04	0.052	0.049		0.0019	0.00202	0.00199
					518.8	0.039	0.051	0.048		0.00189	0.00201	0.00198
					538.8	0.038	0.049	0.047		0.00188	0.00199	0.00197
					558.8	0.037	0.048	0.046		0.00187	0.00198	0.00196
					578.8	0.037	0.047	0.046		0.00187	0.00197	0.00196
					598.8	0.036	0.047	0.045		0.00186	0.00197	0.00195
					618.8	0.035	0.045	0.044		0.00185	0.00195	0.00194
					638.8	0.035	0.045	0.043		0.00185	0.00195	0.00193
					718.8	0.061	0.096	0.059		0.00211	0.00246	0.00209
					778.8	0.064	0.104	0.061		0.00214	0.00254	0.00211
					838.8	0.066	0.109	0.065		0.00216	0.00259	0.00215
					898.8	0.067	0.113	0.066		0.00217	0.00263	0.00216
					958.8	0.069	0.117	0.068		0.00219	0.00267	0.00218
					1018.8	0.07	0.122	0.068		0.0022	0.00272	0.00218
					1078.9	0.072	0.126	0.069		0.00222	0.00276	0.00219
					1138.8	0.073	0.131	0.071		0.00223	0.00281	0.00221
					1198.9	0.075	0.135	0.073		0.00225	0.00285	0.00223
					1258.9	0.076	0.139	0.074		0.00226	0.00289	0.00224
					1318.9	0.077	0.143	0.074		0.00227	0.00293	0.00224
					1378.9	0.078	0.147	0.076		0.00228	0.00297	0.00226
					1438.9	0.079	0.151	0.079		0.00229	0.00301	0.00229
					1498.9	0.08	0.155	0.079		0.0023	0.00305	0.00229
					1558.9	0.081	0.158	0.081		0.00231	0.00308	0.00231
					1618.9	0.082	0.161	0.082		0.00232	0.00311	0.00232
					1678.9	0.082	0.164	0.082		0.00232	0.00314	0.00232
					1738.9	0.083	0.167	0.083		0.00233	0.00317	0.00233
					1798.9	0.084	0.169	0.082		0.00234	0.00319	0.00232
					1858.9	0.084	0.172	0.084		0.00234	0.00322	0.00234
					1918.9	0.085	0.174	0.085		0.00235	0.00324	0.00235
					1978.9	0.085	0.177	0.084		0.00235	0.00327	0.00234
					2038.9	0.086	0.179	0.084		0.00236	0.00329	0.00234
					2098.9	0.087	0.181	0.087		0.00237	0.00331	0.00237
					2158.9	0.087	0.184	0.088		0.00237	0.00334	0.00238
					2219	0.087	0.185	0.087		0.00237	0.00335	0.00237
					2338.9	0.089	0.191	0.089		0.00239	0.00341	0.00239
					2458.9	0.09	0.195	0.087		0.0024	0.00345	0.00237
					2579	0.09	0.199	0.089		0.0024	0.00349	0.00239
					2698.9	0.091	0.202	0.091		0.00241	0.00352	0.00241
					2819	0.092	0.205	0.091		0.00242	0.00355	0.00241
					2939	0.092	0.208	0.092		0.00242	0.00358	0.00242
					3059	0.093	0.211	0.093		0.00243	0.00361	0.00243
					3179	0.093	0.213	0.093		0.00243	0.00363	0.00243
					3299	0.094	0.215	0.093		0.00244	0.00365	0.00243
					3419.2	0.094	0.217	0.093		0.00244	0.00367	0.00243
					3539.1	0.094	0.219	0.095		0.00244	0.00369	0.00245
					3719.2	0.095	0.222	0.094		0.00245	0.00372	0.00244
					3899.2	0.095	0.224	0.094		0.00245	0.00374	0.00244
					4079	0.096	0.226	0.096		0.00246	0.00376	0.00246
					4259	0.096	0.227	0.096		0.00246	0.00377	0.00246

## Sheet: Exp3
Actinic light profile					Fluorescence fluxes					standard deviations
interval duration [s]	start time [s]	end time [s]	light intensity [uE/m2s]		time [s]	F'0 [V]	F'm [V]	F' [V]		F'0	F'm	F'
2.3	0	2.3	0.01		2.3	0.06	0.144	0.057		0.0021	0.00294	0.00207
120.3	2.3	122.6	22		45.3	0.059	0.142	0.06		0.00209	0.00292	0.0021
60	122.6	182.6	1028		85.3	0.06	0.144	0.06		0.0021	0.00294	0.0021
120	182.6	302.6	126		125.3	0.06	0.147	0.06		0.0021	0.00297	0.0021
60.3	302.6	362.9	825		165.6	0.047	0.088	0.083		0.00197	0.00238	0.00233
660	362.9	1022.9	1028		205.6	0.056	0.124	0.063		0.00206	0.00274	0.00213
60	1022.9	1082.9	70		245.6	0.057	0.128	0.062		0.00207	0.00278	0.00212
60	1082.9	1142.9	1028		285.6	0.058	0.134	0.062		0.00208	0.00284	0.00212
60	1142.9	1202.9	53		325.6	0.043	0.074	0.062		0.00193	0.00224	0.00212
60	1202.9	1262.9	13		365.6	0.04	0.065	0.052		0.0019	0.00215	0.00202
60	1262.9	1322.9	53		405.9	0.036	0.056	0.047		0.00186	0.00206	0.00197
60	1322.9	1382.9	1028		445.9	0.035	0.052	0.044		0.00185	0.00202	0.00194
180	1382.9	1562.9	95		485.9	0.033	0.049	0.041		0.00183	0.00199	0.00191
60	1562.9	1622.9	1287		525.9	0.032	0.047	0.04		0.00182	0.00197	0.0019
180	1622.9	1802.9	166		565.9	0.032	0.046	0.038		0.00182	0.00196	0.00188
60	1802.9	1862.9	1594		605.9	0.031	0.045	0.037		0.00181	0.00195	0.00187
60	1862.9	1922.9	166		645.9	0.03	0.043	0.037		0.0018	0.00193	0.00187
60	1922.9	1982.9	1287		685.9	0.03	0.043	0.036		0.0018	0.00193	0.00186
60	1982.9	2042.9	1952		725.9	0.03	0.042	0.035		0.0018	0.00192	0.00185
120	2042.9	2162.9	1594		765.9	0.029	0.041	0.034		0.00179	0.00191	0.00184
60	2162.9	2222.9	1952		805.9	0.029	0.041	0.033		0.00179	0.00191	0.00183
60	2222.9	2282.9	126		845.9	0.029	0.041	0.035		0.00179	0.00191	0.00185
120.3	2282.9	2403.2	216		885.9	0.029	0.04	0.034		0.00179	0.0019	0.00184
7025	2403.2	9428.2	0.01		925.9	0.029	0.04	0.033		0.00179	0.0019	0.00183
					965.9	0.029	0.04	0.033		0.00179	0.0019	0.00183
					1005.9	0.029	0.04	0.033		0.00179	0.0019	0.00183
					1046	0.045	0.081	0.044		0.00195	0.00231	0.00194
					1090	0.026	0.034	0.03		0.00176	0.00184	0.0018
					1153.9	0.041	0.069	0.04		0.00191	0.00219	0.0019
					1194	0.045	0.08	0.042		0.00195	0.0023	0.00192
					1234	0.046	0.084	0.044		0.00196	0.00234	0.00194
					1274	0.046	0.084	0.044		0.00196	0.00234	0.00194
					1314	0.048	0.09	0.045		0.00198	0.0024	0.00195
					1354	0.026	0.035	0.03		0.00176	0.00185	0.0018
					1394	0.043	0.075	0.042		0.00193	0.00225	0.00192
					1449	0.047	0.086	0.045		0.00197	0.00236	0.00195
					1489	0.048	0.09	0.046		0.00198	0.0024	0.00196
					1529	0.049	0.096	0.047		0.00199	0.00246	0.00197
					1569	0.029	0.04	0.036		0.00179	0.0019	0.00186
					1634	0.045	0.08	0.044		0.00195	0.0023	0.00194
					1674	0.047	0.088	0.046		0.00197	0.00238	0.00196
					1714	0.048	0.092	0.047		0.00198	0.00242	0.00197
					1754	0.05	0.097	0.049		0.002	0.00247	0.00199
					1794	0.051	0.102	0.05		0.00201	0.00252	0.002
					1834	0.028	0.038	0.034		0.00178	0.00188	0.00184
					1874	0.046	0.084	0.045		0.00196	0.00234	0.00195
					1914	0.048	0.092	0.048		0.00198	0.00242	0.00198
					1954	0.026	0.035	0.031		0.00176	0.00185	0.00181
					1997	0.024	0.032	0.03		0.00174	0.00182	0.0018
					2037	0.023	0.03	0.028		0.00173	0.0018	0.00178
					2077.9	0.024	0.031	0.028		0.00174	0.00181	0.00178
					2118.1	0.023	0.03	0.027		0.00173	0.0018	0.00177
					2158	0.023	0.03	0.026		0.00173	0.0018	0.00176
					2214	0.022	0.028	0.025		0.00172	0.00178	0.00175
					2326	0.04	0.067	0.039		0.0019	0.00217	0.00189
					2366	0.043	0.075	0.042		0.00193	0.00225	0.00192
					2405.9	0.045	0.082	0.044		0.00195	0.00232	0.00194
					2586.3	0.05	0.1	0.042		0.002	0.0025	0.00192
					2766.3	0.052	0.107	0.045		0.00202	0.00257	0.00195
					2946.2	0.053	0.111	0.048		0.00203	0.00261	0.00198
					3126.5	0.054	0.114	0.048		0.00204	0.00264	0.00198
					3306.5	0.054	0.116	0.049		0.00204	0.00266	0.00199
					3486.4	0.055	0.118	0.047		0.00205	0.00268	0.00197
					3666.6	0.055	0.12	0.051		0.00205	0.0027	0.00201
					3846.7	0.055	0.121	0.052		0.00205	0.00271	0.00202
					4026.6	0.056	0.123	0.05		0.00206	0.00273	0.002
					4206.7	0.056	0.125	0.052		0.00206	0.00275	0.00202
					4386.8	0.056	0.126	0.051		0.00206	0.00276	0.00201
					4566.7	0.056	0.127	0.051		0.00206	0.00277	0.00201
					4746.7	0.057	0.128	0.052		0.00207	0.00278	0.00202
					4926.8	0.057	0.129	0.053		0.00207	0.00279	0.00203
					5106.7	0.057	0.129	0.053		0.00207	0.00279	0.00203
					5286.7	0.057	0.13	0.053		0.00207	0.0028	0.00203
					5466.7	0.057	0.131	0.054		0.00207	0.00281	0.00204
					5646.6	0.057	0.131	0.052		0.00207	0.00281	0.00202
					5827	0.057	0.132	0.052		0.00207	0.00282	0.00202
					6007	0.057	0.132	0.052		0.00207	0.00282	0.00202
					6186.9	0.058	0.132	0.052		0.00208	0.00282	0.00202
					6366.4	0.058	0.132	0.055		0.00208	0.00282	0.00205
					6546.9	0.058	0.133	0.053		0.00208	0.00283	0.00203
					6727	0.058	0.133	0.054		0.00208	0.00283	0.00204
					6906.8	0.058	0.133	0.052		0.00208	0.00283	0.00202
					7087	0.058	0.133	0.055		0.00208	0.00283	0.00205
					7267.5	0.058	0.133	0.053		0.00208	0.00283	0.00203
					7447.5	0.058	0.134	0.054		0.00208	0.00284	0.00204
					7627.3	0.058	0.134	0.054		0.00208	0.00284	0.00204
					7807.3	0.058	0.134	0.054		0.00208	0.00284	0.00204
					7987.3	0.058	0.134	0.053		0.00208	0.00284	0.00203
					8167.4	0.058	0.134	0.053		0.00208	0.00284	0.00203
					8347.5	0.058	0.134	0.054		0.00208	0.00284	0.00204
					8527.5	0.058	0.134	0.054		0.00208	0.00284	0.00204
					8707.8	0.058	0.134	0.054		0.00208	0.00284	0.00204
					8887.6	0.058	0.134	0.052		0.00208	0.00284	0.00202
					9067.7	0.058	0.134	0.054		0.00208	0.00284	0.00204
					9247.9	0.058	0.135	0.054		0.00208	0.00285	0.00204
					9427.2	0.058	0.134	0.055		0.00208	0.00284	0.00205

## Sheet: Val1
Actinic light profile					Fluorescence fluxes					standard deviations
interval duration [s]	start time [s]	end time [s]	light intensity [uE/m2s]		time [s]	F'0 [V]	F'm [V]	F' [V]		F'0	F'm	F'
12	0	12	1e-05		12	0.084	0.238	0.085		0.00234	0.00388	0.00235
526	12	538	833		42	0.08	0.204	0.17		0.0023	0.00354	0.0032
964	538	1502	1e-05		78	0.069	0.146	0.137		0.00219	0.00296	0.00287
					98	0.062	0.119	0.107		0.00212	0.00269	0.00257
					118	0.058	0.104	0.09		0.00208	0.00254	0.0024
					138	0.055	0.094	0.08		0.00205	0.00244	0.0023
					158	0.053	0.09	0.075		0.00203	0.0024	0.00225
					178	0.053	0.09	0.073		0.00203	0.0024	0.00223
					198	0.053	0.09	0.072		0.00203	0.0024	0.00222
					218	0.053	0.09	0.071		0.00203	0.0024	0.00221
					238	0.053	0.09	0.071		0.00203	0.0024	0.00221
					258	0.053	0.089	0.07		0.00203	0.00239	0.0022
					278	0.052	0.087	0.068		0.00202	0.00237	0.00218
					298	0.052	0.086	0.066		0.00202	0.00236	0.00216
					318	0.051	0.084	0.066		0.00201	0.00234	0.00216
					338	0.05	0.082	0.064		0.002	0.00232	0.00214
					358	0.049	0.079	0.062		0.00199	0.00229	0.00212
					378	0.049	0.078	0.061		0.00199	0.00228	0.00211
					398	0.048	0.075	0.059		0.00198	0.00225	0.00209
					418	0.047	0.073	0.058		0.00197	0.00223	0.00208
					438	0.046	0.071	0.056		0.00196	0.00221	0.00206
					458	0.045	0.069	0.055		0.00195	0.00219	0.00205
					478	0.044	0.067	0.053		0.00194	0.00217	0.00203
					498	0.043	0.065	0.053		0.00193	0.00215	0.00203
					518	0.043	0.063	0.051		0.00193	0.00213	0.00201
					538	0.042	0.061	0.05		0.00192	0.00211	0.002
					602	0.069	0.146	0.07		0.00219	0.00296	0.0022
					662	0.071	0.154	0.071		0.00221	0.00304	0.00221
					722	0.072	0.16	0.073		0.00222	0.0031	0.00223
					782	0.073	0.164	0.074		0.00223	0.00314	0.00224
					842	0.074	0.168	0.073		0.00224	0.00318	0.00223
					962	0.075	0.176	0.076		0.00225	0.00326	0.00226
					1082	0.076	0.181	0.077		0.00226	0.00331	0.00227
					1202	0.077	0.184	0.08		0.00227	0.00334	0.0023
					1322	0.077	0.187	0.08		0.00227	0.00337	0.0023
					1502	0.078	0.191	0.08		0.00228	0.00341	0.0023

## Sheet: Val2
Actinic light profile					Fluorescence fluxes					standard deviations
interval duration [s]	start time [s]	end time [s]	light intensity [uE/m2s]		time [s]	F'0 [V]	F'm [V]	F' [V]		F'0	F'm	F'
2	0	2	1e-06		2	0.09	0.221	0.09		0.0024	0.00371	0.0024
60	2	62	14		62	0.09	0.222	0.094		0.0024	0.00372	0.00244
60	62	122	21		122	0.091	0.225	0.094		0.00241	0.00375	0.00244
60	122	182	1602		182	0.047	0.067	0.064		0.00197	0.00217	0.00214
60	182	242	1960		242	0.04	0.055	0.053		0.0019	0.00205	0.00203
60	242	302	45		302	0.078	0.161	0.087		0.00228	0.00311	0.00237
60	302	362	78		362	0.081	0.174	0.09		0.00231	0.00324	0.0024
60	362	422	1036		422	0.041	0.057	0.051		0.00191	0.00207	0.00201
60	422	482	1295		482	0.037	0.049	0.046		0.00187	0.00199	0.00196
60	482	542	134		542	0.072	0.136	0.079		0.00222	0.00286	0.00229
60	542	602	174		602	0.071	0.135	0.08		0.00221	0.00285	0.0023
60	602	662	1602		662	0.038	0.05	0.048		0.00188	0.002	0.00198
60	662	722	1960		722	0.033	0.043	0.042		0.00183	0.00193	0.00192
60	722	782	45		782	0.069	0.127	0.075		0.00219	0.00277	0.00225
60	782	842	78		842	0.073	0.142	0.082		0.00223	0.00292	0.00232
60	842	902	134		902	0.072	0.137	0.08		0.00222	0.00287	0.0023
60	902	962	1960		962	0.036	0.048	0.047		0.00186	0.00198	0.00197
60	962	1022	1960		1022	0.033	0.042	0.042		0.00183	0.00192	0.00192
60	1022	1082	1e-06		1082	0.061	0.102	0.063		0.00211	0.00252	0.00213
60	1082	1142	1e-06		1142	0.064	0.112	0.064		0.00214	0.00262	0.00214
60	1142	1202	1e-06		1202	0.067	0.12	0.067		0.00217	0.0027	0.00217
										2586.3	0.05	0.1	0.042		2939	0.092	0.208	0.092
										2766.3	0.052	0.107	0.045		3059	0.093	0.211	0.093
										2946.2	0.053	0.111	0.048		3179	0.093	0.213	0.093
										3126.5	0.054	0.114	0.048		3299	0.094	0.215	0.093
										3306.5	0.054	0.116	0.049		3419.2	0.094	0.217	0.093
										3486.4	0.055	0.118	0.047		3539.1	0.094	0.219	0.095
										3666.6	0.055	0.12	0.051		3719.2	0.095	0.222	0.094
										3846.7	0.055	0.121	0.052		3899.2	0.095	0.224	0.094
										4026.6	0.056	0.123	0.05		4079	0.096	0.226	0.096
										4206.7	0.056	0.125	0.052		4259	0.096	0.227	0.096
										4386.8	0.056	0.126	0.051
										4566.7	0.056	0.127	0.051
										4746.7	0.057	0.128	0.052
										4926.8	0.057	0.129	0.053
										5106.7	0.057	0.129	0.053
										5286.7	0.057	0.13	0.053
										5466.7	0.057	0.131	0.054
										5646.6	0.057	0.131	0.052
										5827	0.057	0.132	0.052
										6007	0.057	0.132	0.052
										6186.9	0.058	0.132	0.052
										6366.4	0.058	0.132	0.055
										6546.9	0.058	0.133	0.053
										6727	0.058	0.133	0.054
										6906.8	0.058	0.133	0.052
										7087	0.058	0.133	0.055
										7267.5	0.058	0.133	0.053
										7447.5	0.058	0.134	0.054
										7627.3	0.058	0.134	0.054
										7807.3	0.058	0.134	0.054
										7987.3	0.058	0.134	0.053
										8167.4	0.058	0.134	0.053
										8347.5	0.058	0.134	0.054
										8527.5	0.058	0.134	0.054
										8707.8	0.058	0.134	0.054
										8887.6	0.058	0.134	0.052
										9067.7	0.058	0.134	0.054
										9247.9	0.058	0.135	0.054
										9427.2	0.058	0.134	0.055

## Sheet: Val3
Actinic light profile					Fluorescence fluxes					standard deviations
interval duration [s]	start time [s]	end time [s]	light intensity [uE/m2s]		time [s]	F'0 [V]	F'm [V]	F' [V]		F'0	F'm	F'
2.3	0	2.3	339		2.3	0.051	0.133	0.05		0.00201	0.00283	0.002
120.3	2.3	122.6	339		45.3	0.042	0.084	0.066		0.00192	0.00234	0.00216
120.3	122.6	242.9	1952		85.3	0.041	0.078	0.054		0.00191	0.00228	0.00204
120.3	242.9	363.2	273		125.3	0.042	0.083	0.051		0.00192	0.00233	0.00201
960.3	363.2	1323.5	1952		165.6	0.034	0.058	0.056		0.00184	0.00208	0.00206
120.3	1323.5	1443.8	1594		205.6	0.032	0.051	0.048		0.00182	0.00201	0.00198
120.3	1443.8	1564.1	1287		263.6	0.045	0.098	0.054		0.00195	0.00248	0.00204
120.3	1564.1	1684.4	1952		303.6	0.045	0.098	0.053		0.00195	0.00248	0.00203
240.3	1684.4	1924.7	0.01		343.6	0.046	0.102	0.054		0.00196	0.00252	0.00204
120.3	1924.7	2045	825		383.6	0.03	0.046	0.044		0.0018	0.00196	0.00194
120.3	2045	2165.3	1952		423.6	0.027	0.039	0.038		0.00177	0.00189	0.00188
120.3	2165.3	2285.6	0.01		476.6	0.025	0.035	0.032		0.00175	0.00185	0.00182
120.3	2285.6	2405.9	1952		521.6	0.023	0.032	0.03		0.00173	0.00182	0.0018
					561.6	0.022	0.03	0.027		0.00172	0.0018	0.00177
					604.6	0.021	0.028	0.026		0.00171	0.00178	0.00176
					644.6	0.02	0.027	0.026		0.0017	0.00177	0.00176
					684.6	0.02	0.026	0.024		0.0017	0.00176	0.00174
					752.6	0.019	0.025	0.024		0.00169	0.00175	0.00174
					792.6	0.019	0.024	0.022		0.00169	0.00174	0.00172
					832.6	0.019	0.024	0.023		0.00169	0.00174	0.00173
					896.6	0.018	0.023	0.022		0.00168	0.00173	0.00172
					936.6	0.018	0.023	0.021		0.00168	0.00173	0.00171
					976.6	0.018	0.023	0.022		0.00168	0.00173	0.00172
					1016.6	0.018	0.022	0.021		0.00168	0.00172	0.00171
					1056.6	0.018	0.022	0.021		0.00168	0.00172	0.00171
					1096.6	0.017	0.022	0.021		0.00167	0.00172	0.00171
					1136.6	0.017	0.022	0.02		0.00167	0.00172	0.0017
					1176.6	0.017	0.021	0.02		0.00167	0.00171	0.0017
					1216.6	0.017	0.021	0.02		0.00167	0.00171	0.0017
					1256.7	0.017	0.021	0.02		0.00167	0.00171	0.0017
					1296.7	0.017	0.021	0.02		0.00167	0.00171	0.0017
					1336.7	0.017	0.021	0.019		0.00167	0.00171	0.00169
					1376.7	0.017	0.021	0.02		0.00167	0.00171	0.0017
					1416.7	0.017	0.021	0.02		0.00167	0.00171	0.0017
					1456.7	0.017	0.021	0.02		0.00167	0.00171	0.0017
					1496.7	0.017	0.021	0.019		0.00167	0.00171	0.00169
					1536.7	0.017	0.021	0.019		0.00167	0.00171	0.00169
					1576.7	0.016	0.02	0.019		0.00166	0.0017	0.00169
					1681.7	0.016	0.019	0.018		0.00166	0.00169	0.00168
					1721.7	0.024	0.034	0.022		0.00174	0.00184	0.00172
					1761.7	0.025	0.036	0.024		0.00175	0.00186	0.00174
					1801.7	0.026	0.037	0.023		0.00176	0.00187	0.00173
					1841.7	0.026	0.038	0.027		0.00176	0.00188	0.00177
					1881.7	0.027	0.039	0.024		0.00177	0.00189	0.00174
					1921.7	0.027	0.041	0.024		0.00177	0.00191	0.00174
					1961.7	0.018	0.022	0.02		0.00168	0.00172	0.0017
					2001.7	0.019	0.024	0.021		0.00169	0.00174	0.00171
					2041.7	0.02	0.025	0.021		0.0017	0.00175	0.00171
					2081.7	0.017	0.022	0.021		0.00167	0.00172	0.00171
					2121.7	0.017	0.022	0.021		0.00167	0.00172	0.00171
					2161.8	0.017	0.021	0.02		0.00167	0.00171	0.0017
					2201.7	0.027	0.039	0.027		0.00177	0.00189	0.00177
					2241.7	0.028	0.041	0.025		0.00178	0.00191	0.00175
					2281.9	0.028	0.042	0.025		0.00178	0.00192	0.00175
					2321.8	0.017	0.021	0.02		0.00167	0.00171	0.0017
					2365.6	0.017	0.022	0.021		0.00167	0.00172	0.00171
					2405.8	0.017	0.021	0.021		0.00167	0.00171	0.00171

## Sheet: PI experiment
sample 1
meas.time [s]	P [umol_02/g_chl s]	standard deviation
129	35.5903	4.34
259	48.4375	4.34
Light protocol
interval duration [s]	start time [s]	end time [s]	light intensity [uE/m2s]
130	0	130	400
130	130	260	1500
sample 2
meas.time [s]	P [umol_02/g_chl s]	standard deviation
229	10.5903	4.34
429	44.9653	4.34
Light protocol
interval duration [s]	start time [s]	end time [s]	light intensity [uE/m2s]
230	0	230	100
200	230	430	750
sample 3
meas.time [s]	P [umol_02/g_chl s]	standard deviation
149	22.3958	4.34
299	62.6736	4.34
Light protocol
interval duration [s]	start time [s]	end time [s]	light intensity [uE/m2s]
150	0	150	250
150	150	300	3600

## Sheet: ASII exp
					INDUCTION CURVE EXAMPLE REPORTED IN FIGURE 1
actinic light intensity [uE/m2s]	ASII	standard deviation
45	21.6295	2.41674			actinic light intensity [uE/m2s]	45	80	150	320	940	2050
80	32.2868	1.86225
150	54.9316	1.71981			time [s]	fluorescence [arbitrary units]
320	98.5194	2.0386			0.00111	0.463948	0.491172	0.508108	0.503815	0.616088	0.756075
940	262.181	4.47856			0.00227341	0.470761	0.504639	0.532995	0.548428	0.738427	0.880278
2050	497.935	10.7912			0.00348212	0.480642	0.518049	0.557508	0.599141	0.819516	0.931586
					0.00473809	0.488998	0.533285	0.583402	0.64582	0.870493	0.956436
					0.00604338	0.498992	0.548172	0.61086	0.694194	0.908067	0.967381
					0.00740012	0.508343	0.565049	0.638535	0.737444	0.933134	0.972311
					0.00881055	0.519521	0.583049	0.664853	0.773026	0.950213	0.976902
					0.010277	0.526457	0.601119	0.691048	0.802409	0.961508	0.975968
					0.0118019	0.540508	0.616153	0.715567	0.828629	0.971731	0.978212
					0.0133878	0.552632	0.635488	0.740372	0.850772	0.977267	0.978098
					0.0150373	0.563925	0.650813	0.759782	0.869888	0.979135	0.977267
					0.0167533	0.574579	0.668735	0.777426	0.884412	0.981503	0.978793
					0.0185385	0.590323	0.687518	0.799139	0.898744	0.98303	0.977962
					0.020396	0.600556	0.702694	0.817494	0.910432	0.98574	0.980205
					0.0223289	0.613965	0.718224	0.832284	0.921238	0.989739	0.98115
					0.0243405	0.625256	0.732962	0.841908	0.926534	0.99033	0.977141
					0.0264343	0.64015	0.745047	0.856421	0.937724	0.989155	0.980683
					0.0286138	0.649678	0.761723	0.869986	0.942777	0.989148	0.979032
					0.0308826	0.663011	0.770721	0.879515	0.948184	0.992564	0.979385
					0.0332447	0.674812	0.786157	0.887176	0.951715	0.99257	0.979032
					0.0357042	0.684695	0.795238	0.895646	0.957254	0.992685	0.979271
					0.0382652	0.69854	0.806269	0.905279	0.959967	0.991626	0.977027
					0.0409322	0.70967	0.818295	0.912691	0.961491	0.994335	0.978918
					0.0437098	0.721232	0.824906	0.921407	0.966322	0.992332	0.978679
					0.0466027	0.732256	0.836201	0.926455	0.967028	0.994451	0.979146
					0.049616	0.742137	0.843163	0.931396	0.970318	0.994098	0.980319
					0.052755	0.751665	0.851534	0.936338	0.969965	0.995747	0.979032
					0.0560249	0.761546	0.859097	0.941875	0.971265	0.993392	0.981618
					0.0594317	0.770189	0.864944	0.946815	0.971971	0.995863	0.979032
					0.0629811	0.781297	0.874119	0.950697	0.97245	0.995394	0.979977
					0.0666794	0.788811	0.880118	0.952572	0.973849	0.995388	0.980548
					0.070533	0.797968	0.885765	0.954579	0.973143	0.997981	0.980922
					0.0745487	0.80547	0.892615	0.960337	0.974202	0.997042	0.979738
					0.0787335	0.813843	0.89741	0.961749	0.975615	0.995863	0.981856
					0.0830948	0.820031	0.901645	0.961766	0.977267	0.994572	0.980216
					0.0876402	0.827537	0.90648	0.966112	0.977267	0.999156	0.981618
					0.0923778	0.835009	0.907997	0.96669	0.9768	0.997981	0.979624
					0.0973158	0.841653	0.914842	0.967651	0.977494	0.997628	0.979146
					0.102463	0.847201	0.918124	0.96669	0.980912	0.998097	0.980683
					0.107828	0.854258	0.92222	0.970699	0.980797	0.99857	0.98115
					0.358068	0.991049	0.987636	0.999753	0.995984	1.00387	0.984681
					0.358268	0.992114	0.98917	1.00269	0.99681	0.999513	0.982105
					0.358468	0.990588	0.988349	1.00175	0.996573	1.00151	0.984813
